# Supplementary material for: Haematopoietic stem cell-derived immune cells have reduced X chromosome inactivation skewing in systemic lupus erythematosus
Source: PubMed Central journal article supplement (PMC11503196; doi:10.1136/ard-2024-225585), 2024-06-27

## Supplementary

### Supplementary Table 1: Results of association of medication use on XCI-skewing

The beta columns refer to the effect size of those with/without the drug compared to controls. “P value models” refers to the fit of the model with medication use as a categorical variable compared to the model with SLE as a binary variable. “P value SLE” refers to the P value of the effect of the medication within the SLE cohort only.

| Measure                       | Beta +ve | Beta -ve | P value models | P value SLE |
|-------------------------------|----------|----------|----------------|-------------|
| Hydroxychloroquine            | -0.040   | -0.045   | 0.81           | 0.97        |
| Methotrexate                  | -0.014   | -0.049   | 0.16           | 0.10        |
| Azathioprine or mycophenolate | -0.028   | -0.048   | 0.33           | 0.36        |
| Biologics                     | -0.035   | -0.044   | 0.80           | 0.82        |

### Supplementary Table 2: Immune cell differences between SLE cases and healthy controls

P-values refer to the effect of SLE status on the cell count/measure as taken from a linear regression model controlling for age as a covariate.

| Measure                        | Controls (mean) | SLE Cases (mean) | P value  |
|--------------------------------|-----------------|------------------|----------|
| White Blood Cells              | 5.84            | 6.32             | 0.010    |
| Neutrophils                    | 3.51            | 4.24             | 0.0027   |
| Monocytes                      | 0.41            | 0.54             | 5.43e-10 |
| Lymphocytes                    | 1.74            | 1.39             | 6.31e-05 |
| Lymphocyte Proportion          | 0.30            | 0.23             | 3.03e-09 |
| Monocyte-to-Lymphocyte Ratio   | 0.25            | 0.52             | 2.73e-25 |
| Neutrophil-to-Lymphocyte Ratio | 2.17            | 4.15             | 9.78e-12 |

**Supplementary Table 3: Results of association of SLE status on XCI-skewing following removal of effects of immune cell counts.**

| Measure                        | Beta   | P value |
|--------------------------------|--------|---------|
| White Blood Cells              | -0.049 | 0.013   |
| Neutrophils                    | -0.048 | 0.013   |
| Monocytes                      | -0.051 | 0.0092  |
| Lymphocytes                    | -0.043 | 0.028   |
| Lymphocyte Proportion          | -0.047 | 0.015   |
| Monocyte-to-Lymphocyte Ratio   | -0.044 | 0.025   |
| Neutrophil-to-Lymphocyte Ratio | -0.044 | 0.025   |

**Supplementary Figure 1: XCI-skewing is reduced in SLE cases across age groups.**

Box plots representing the association of SLE on XCI skewing. All boxplots display the median and IQR, and XCI-skewing on the y-axis, and age category on the x axis.

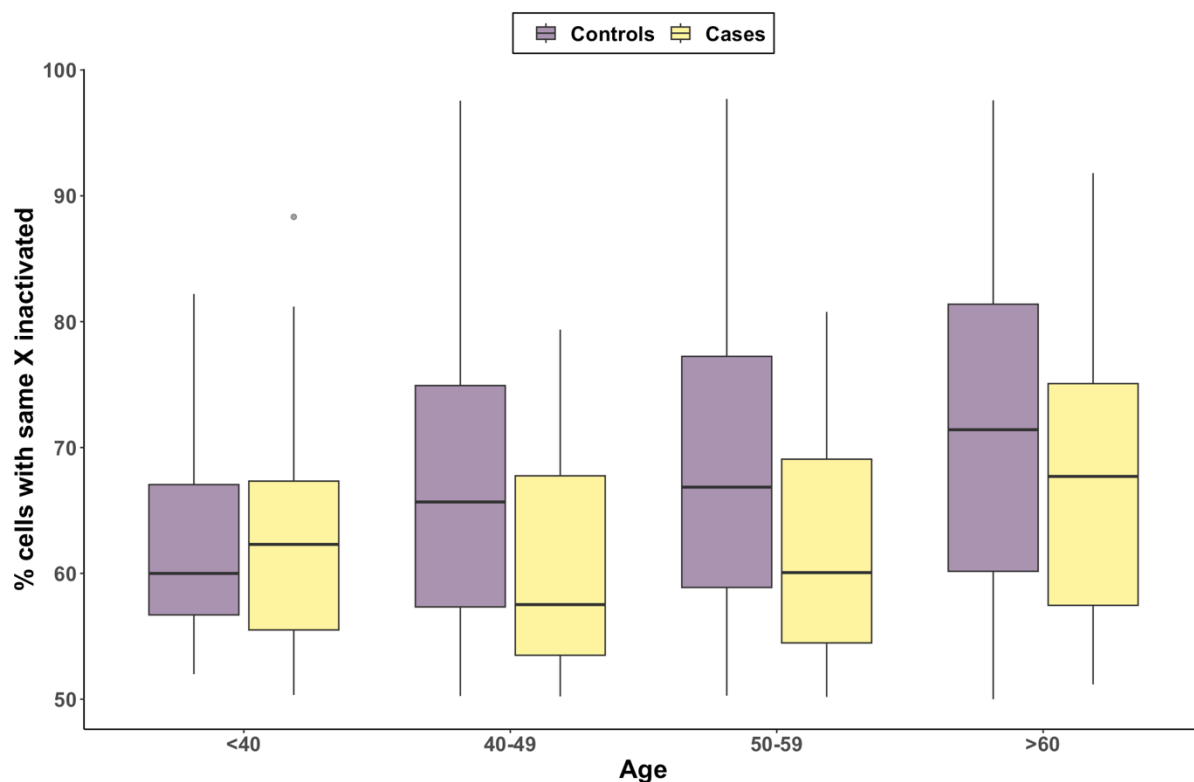

**Supplementary Figure 2: XCI-skewing in SLE cases with and without renal disease compared to controls.**

The correlation between XCI (y-axis) and age (x-axis) is shown in panels on the left and the proportions of individuals (y-axis) with random (50-79%), skewed (80-89%), and extremely skewed (>90%) XCI across increasing age groups (x-axis) are shown in panels on the right. Controls (n=796) are in the upper panels, SLE cases without a history of renal disease (n=144) are in the middle panel, and SLE cases with a history of renal disease (n=37) are in the lower panels.

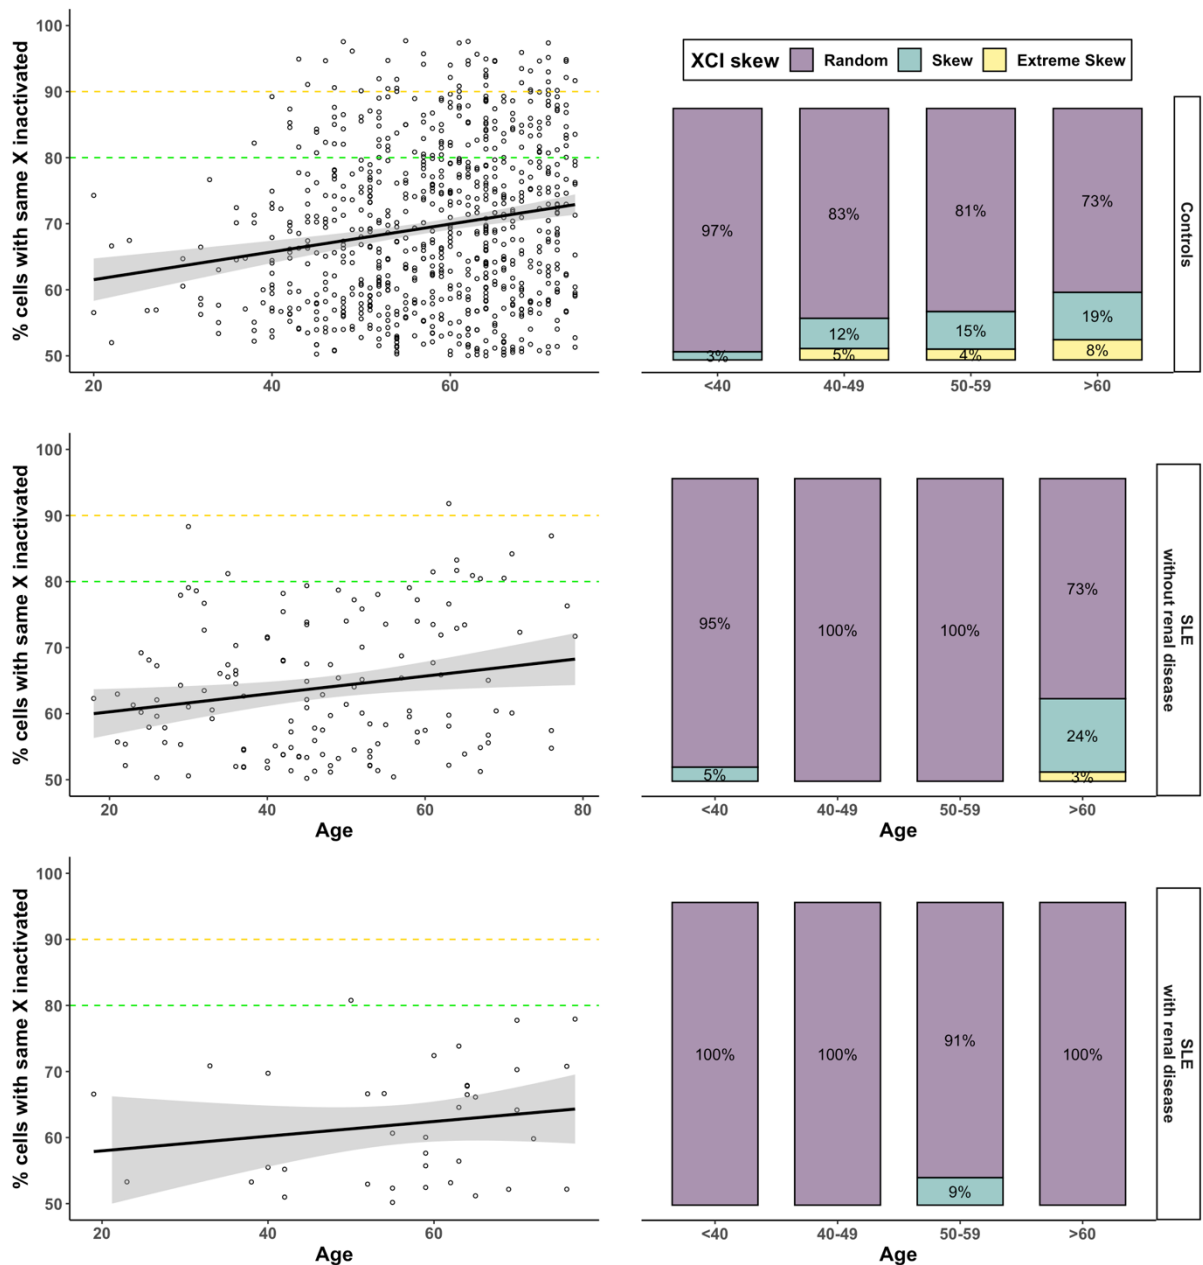

### Supplementary Figure 3: The effect of medication on XCI skewing.

Box plots representing the effect of medication use on XCI skewing. All boxplots display the median and IQR, and XCI-skewing on the y-axis, and age category on the x axis.

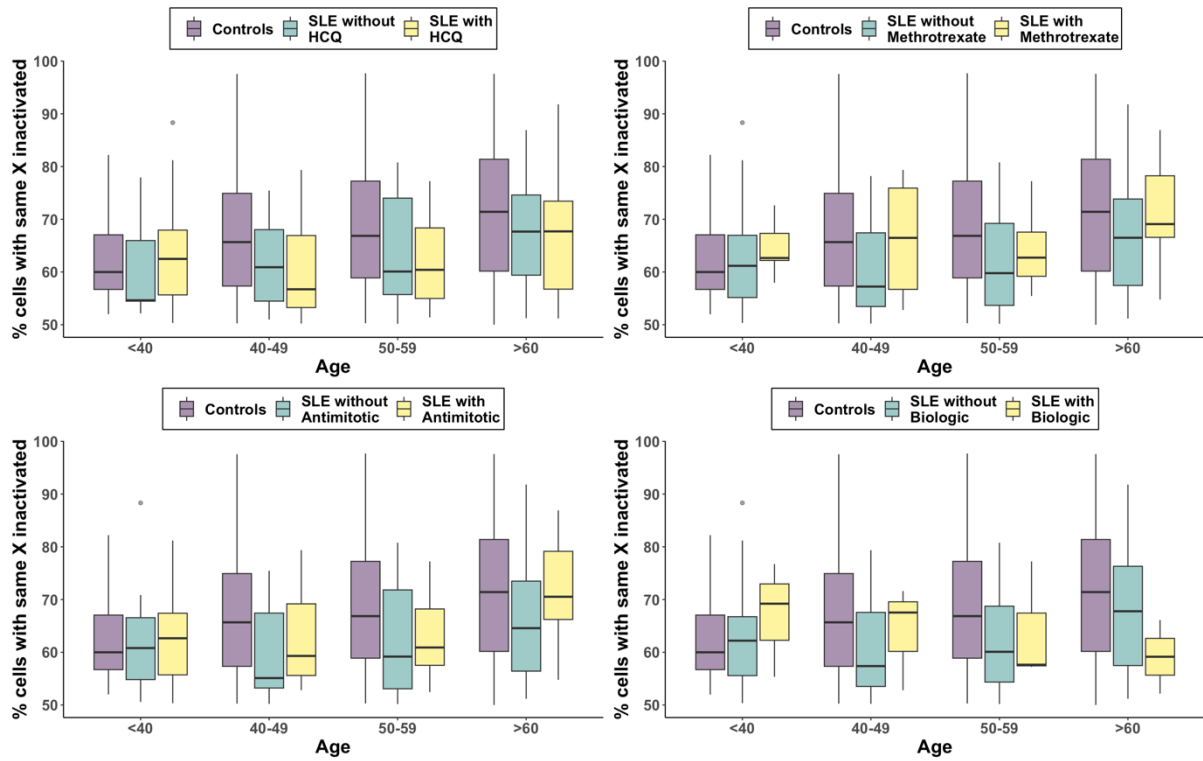

**Supplementary Figure 4: XCI-skewing is reduced in SLE cases across age groups after regressing out effects of Monocyte counts.**

Box plots representing the association of SLE on XCI skewing. All boxplots display the median and IQR, and XCI-skewing on the y-axis, and age category on the x axis.

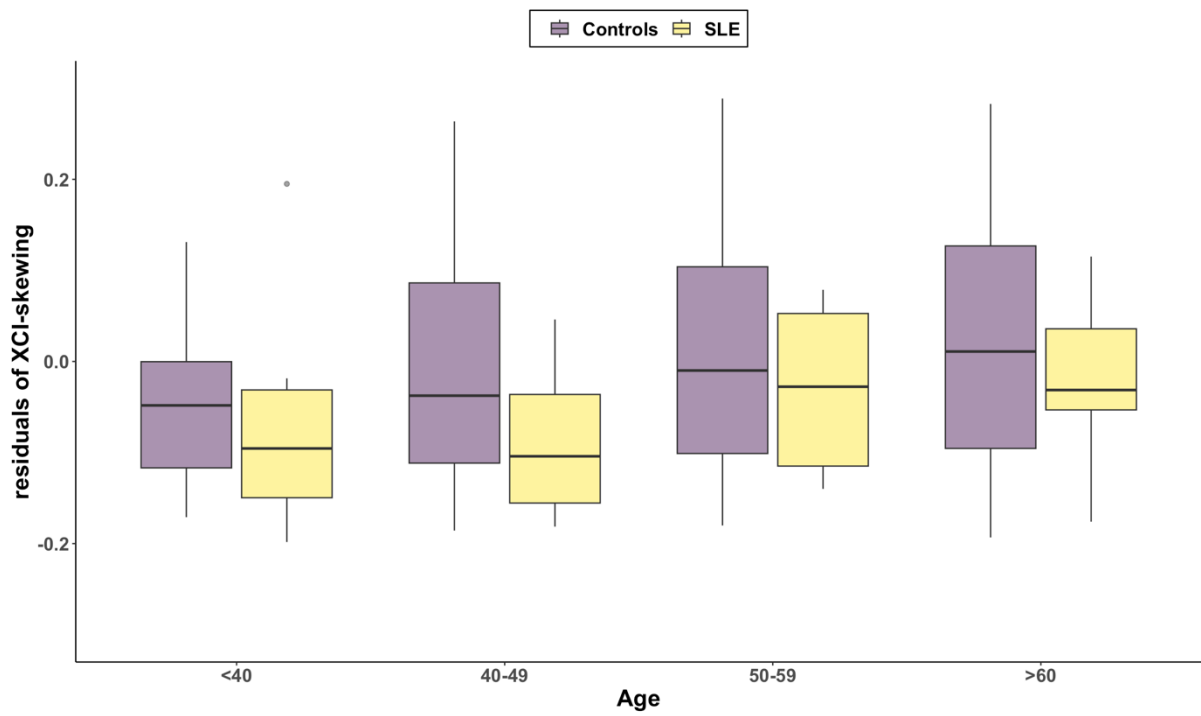

**Supplementary Figure 5: Polygenic Risk Score for SLE is associated with SLE status**

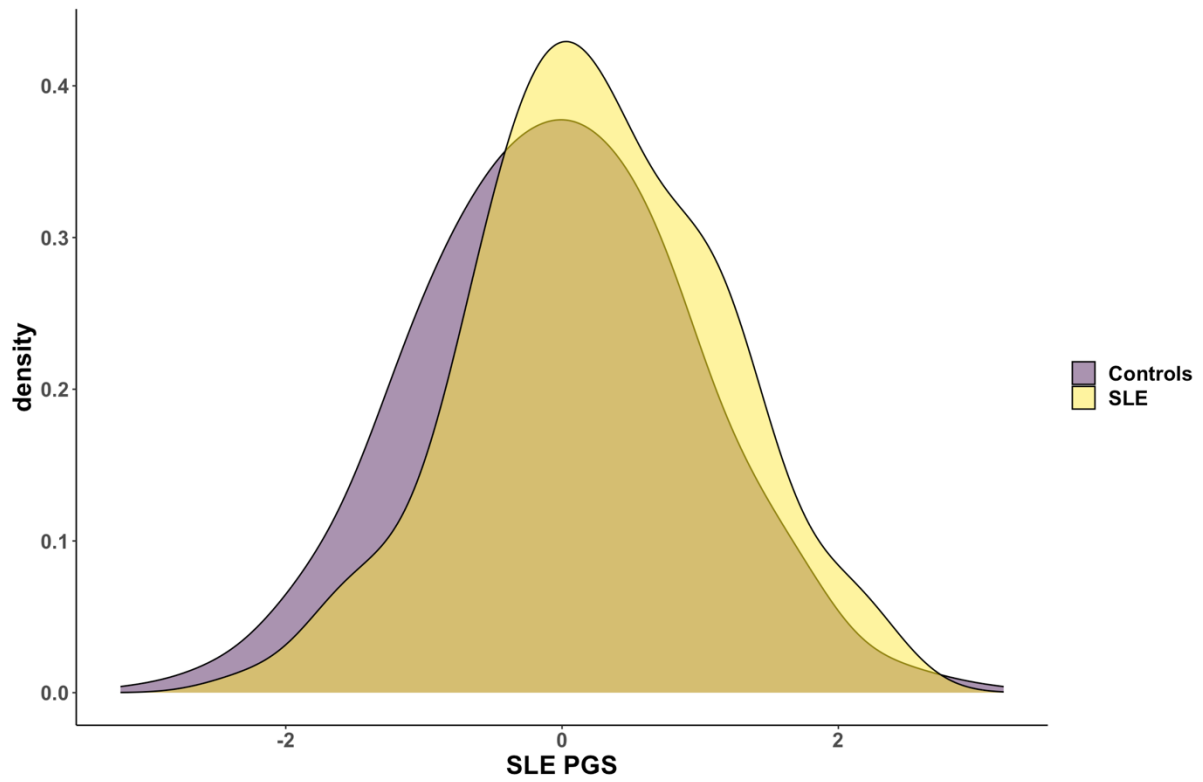

**Supplementary Figure 6: No association of SLE Polygenic Risk Score and XCI-skewing**

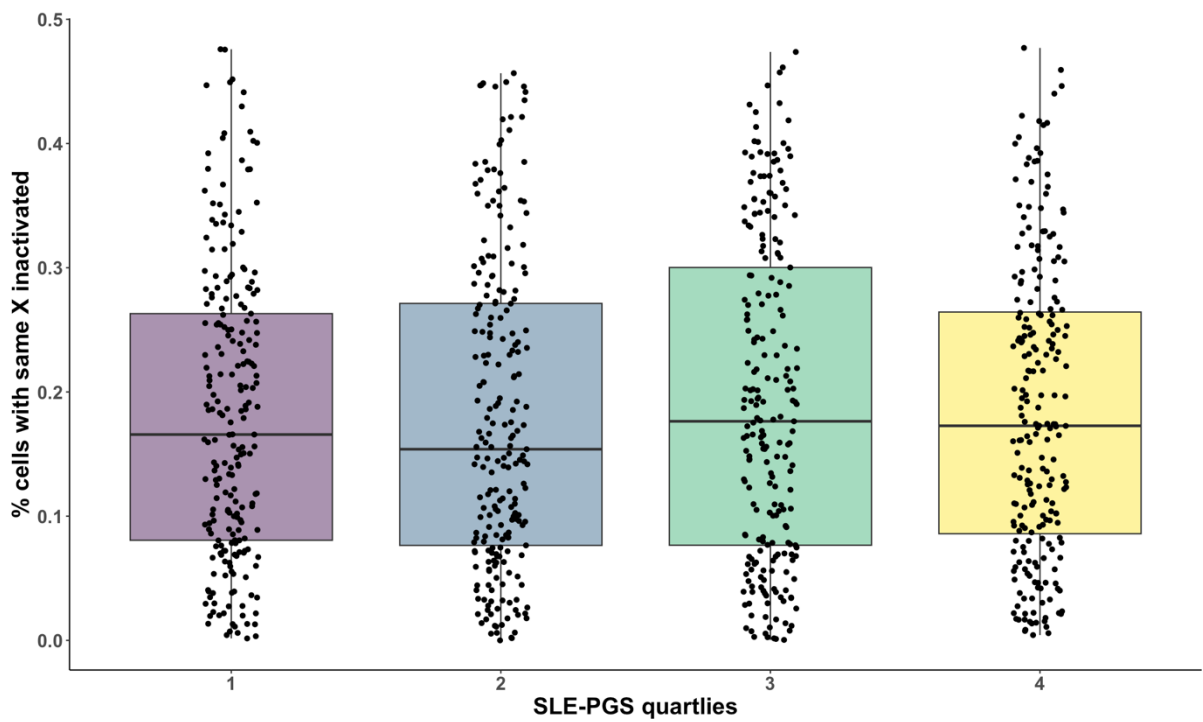

Supplementary Figure 7: A non-linear relationship between age and sSIGLEC-1

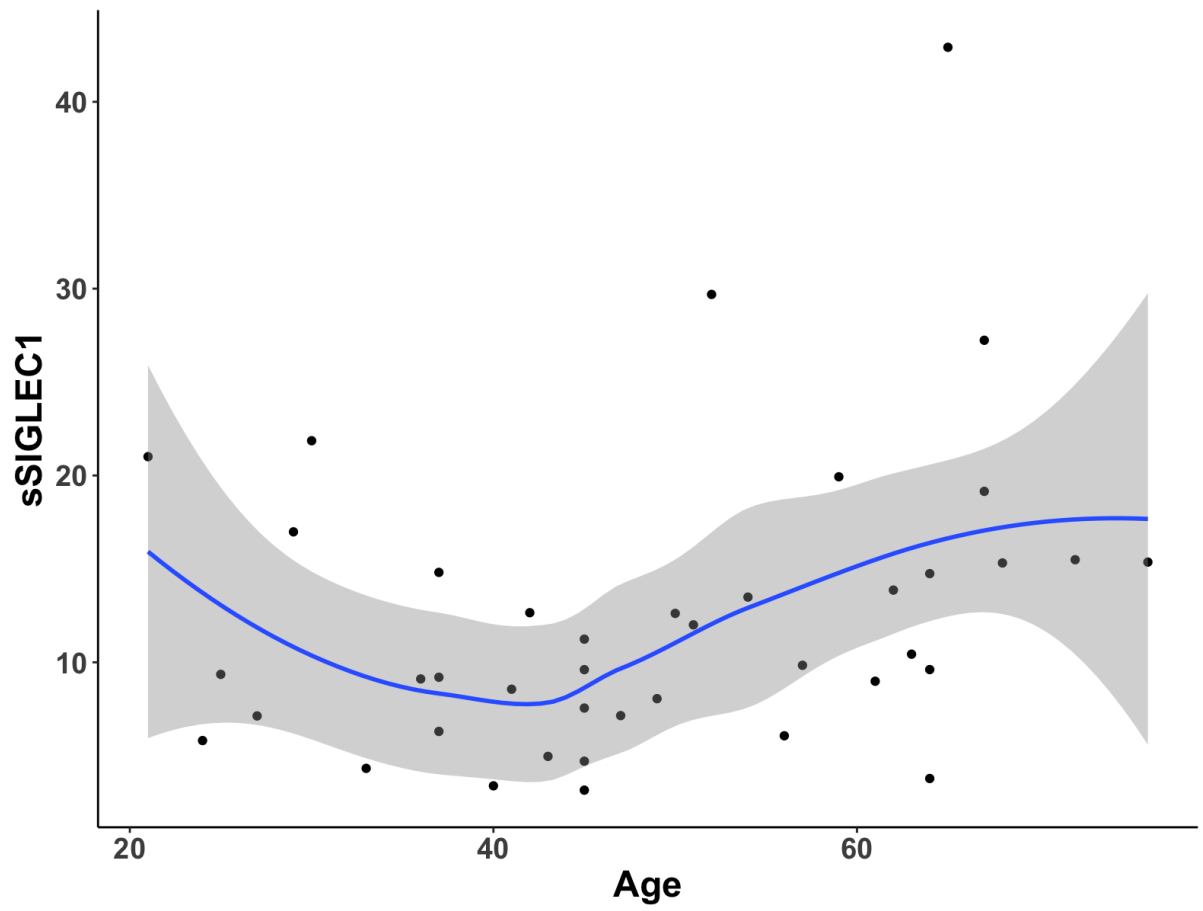

Supplement: ard-83-10-s001.pdf [file ard-83-10-s001.pdf]
